# Supplementary material
Source: PubMed Central journal article supplement (PMC3478383)

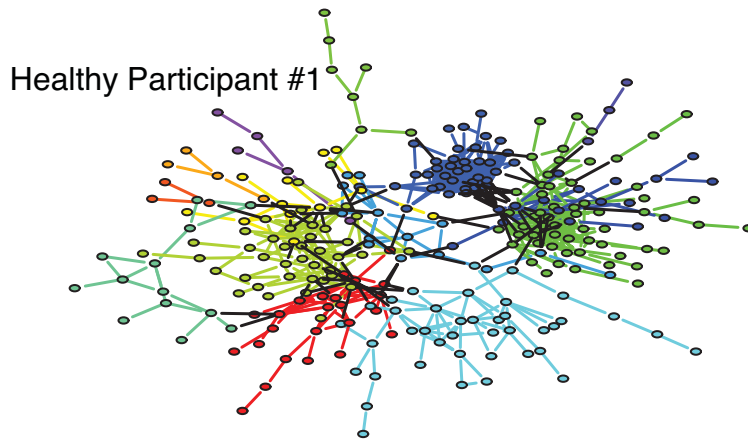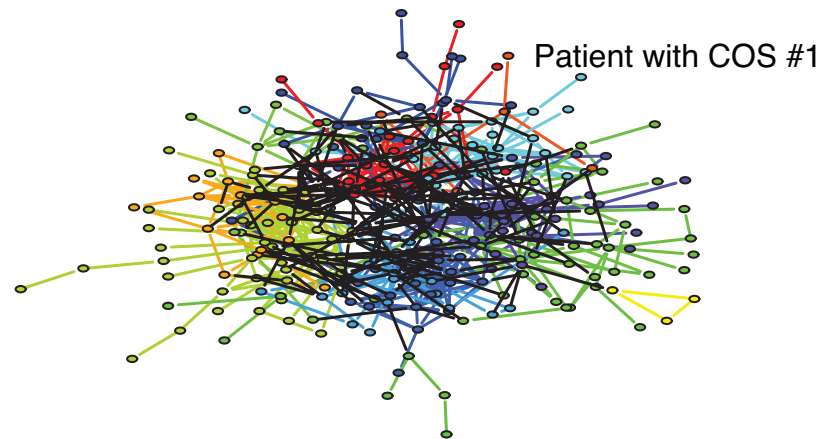

⋮

⋮

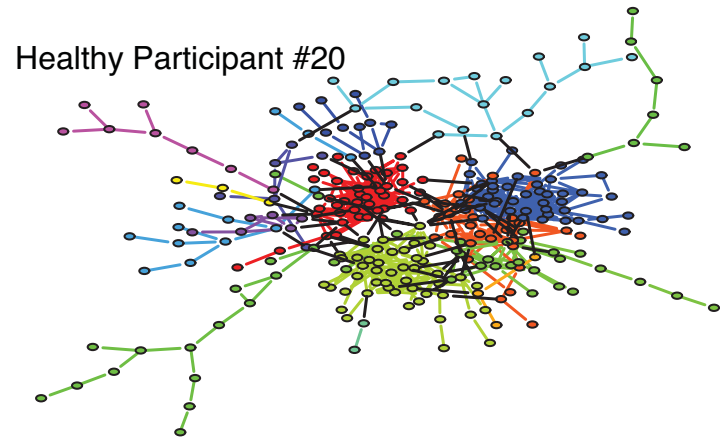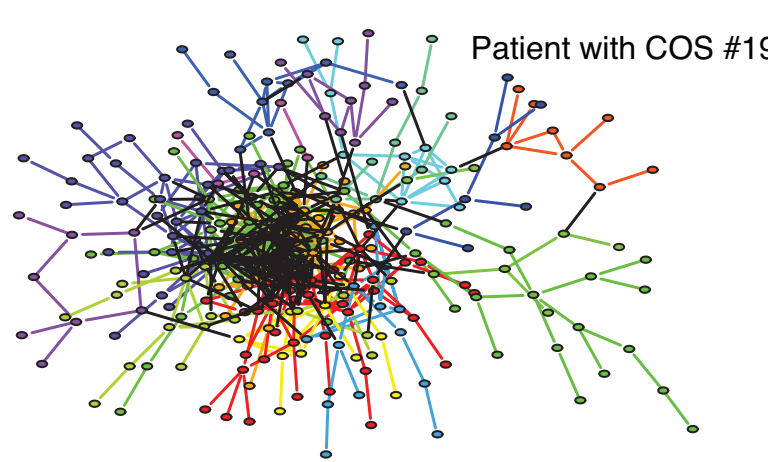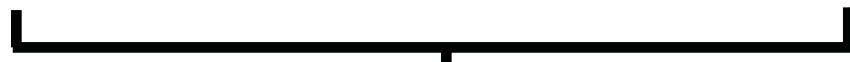

Population difference in modularity,  
19 patients with COS vs. 20 healthy participants:  
Permutation test,  $P = 0.0006$

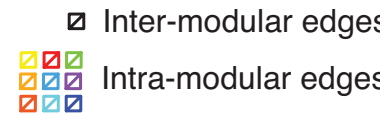

Supplement: NIHMS350402-supplement-01.pdf [file NIHMS350402-supplement-01.pdf]
