# Supplementary material
Source: PubMed Central journal article supplement (PMC3478383)

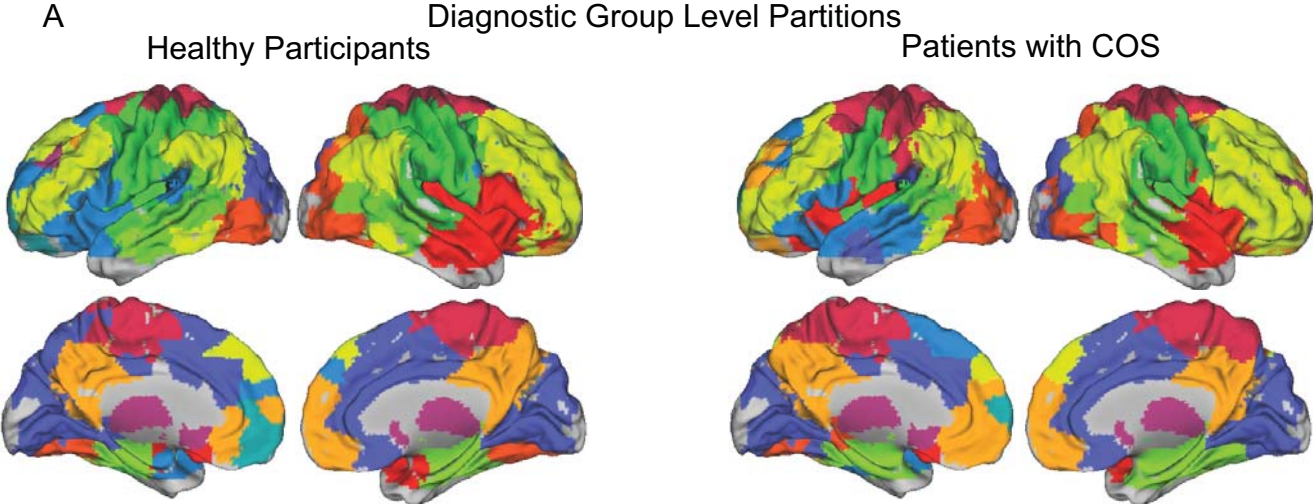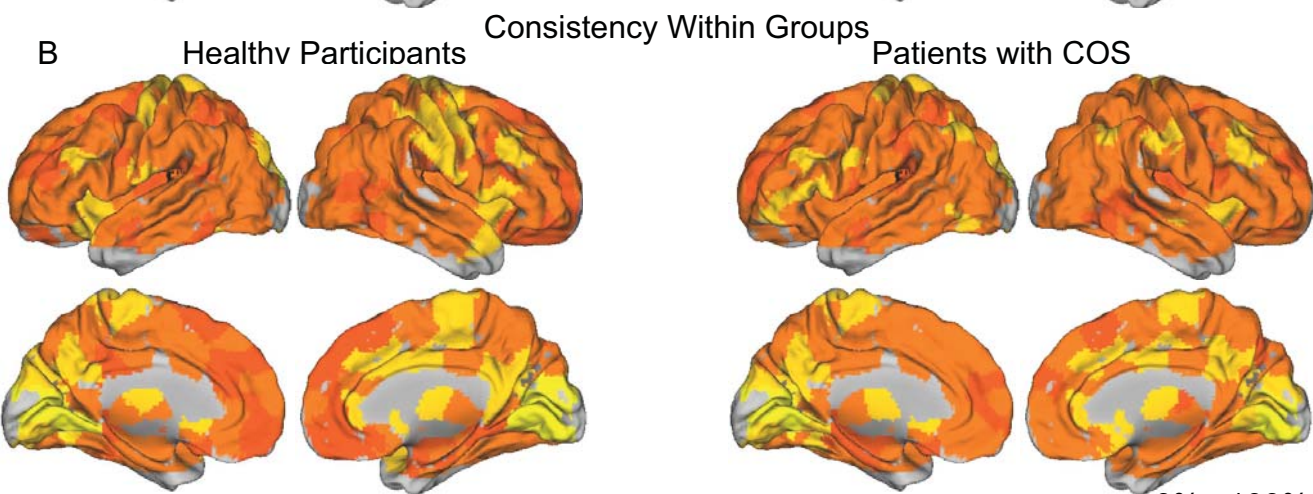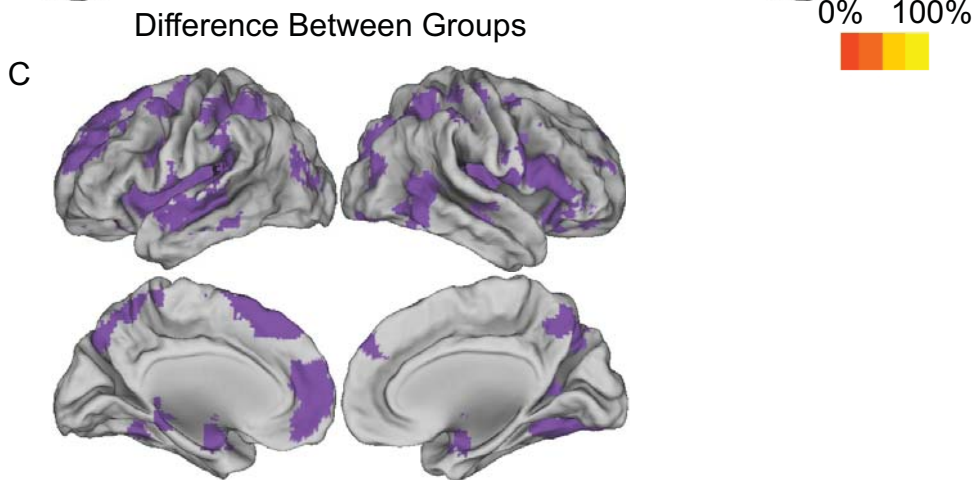

Supplement: NIHMS350402-supplement-02.pdf [file NIHMS350402-supplement-02.pdf]
